# Supplementary material for: Cholesterol confers ferroptosis resistance onto myeloid-biased hematopoietic stem cells and prevents irradiation-induced myelosuppression
Source: PubMed Central journal article supplement — Redox Biol. 2023 Mar 8;62:102661. doi: 10.1016/j.redox.2023.102661 (PMC10025135; doi:10.1016/j.redox.2023.102661), 2023-03-08
Supplement: mmc1.pdf [file mmc1.pdf]

## **Supplementary Materials**

**Cholesterol confers ferroptosis resistance onto myeloid-biased hematopoietic stem cells and prevents irradiation-induced myelosuppression**

Liu et al.

**Table S1****Antibodies used for flow cytometry (FC)**

| <b>Antibody</b>                                 | <b>Origin</b>  | <b>Catalog number</b> | <b>Assay</b> | <b>Dilution</b> |
|-------------------------------------------------|----------------|-----------------------|--------------|-----------------|
| eFluor 450 Mouse Hematopoietic Lineage Cocktail | eBioscience    | Cat# 88-7772-72       | FC           | 1:5             |
| Biotin Mouse Hematopoietic Lineage Cocktail     | eBioscience    | Cat# 88-7774-75       | FC           | 1:50            |
| FITC Mouse Hematopoietic Lineage Cocktail       | eBioscience    | Cat# 22-7770-82       | FC           | 1:5             |
| Anti-Mouse Ly-6A/E (Sca-1), PerCP-Cyanine5.5    | eBioscience    | Cat# 45-5981-82       | FC           | 1:80            |
| Anti-Mouse Ly-6A/E (Sca-1), PE-Cyanine7         | eBioscience    | Cat# 25-5981-82       | FC           | 1:100           |
| Anti-Mouse CD117 (c-Kit), PE                    | eBioscience    | Cat# 12-1172-83       | FC           | 1:200           |
| Anti-Mouse CD117 (c-Kit), APC-eFluor 780        | eBioscience    | Cat# 47-1171-82       | FC           | 1:100           |
| Anti-Mouse CD117 (c-Kit), PE-Cyanine7           | eBioscience    | Cat# 25-1171-82       | FC           | 1:200           |
| Anti-Mouse CD117 (c-Kit), APC                   | eBioscience    | Cat# 17-1171-83       | FC           | 1:100           |
| Anti-Mouse CD34, FITC                           | eBioscience    | Cat# 11-0341-85       | FC           | 1:50            |
| Anti-Mouse CD34, eFluor 660                     | eBioscience    | Cat# 50-0341-82       | FC           | 1:33            |
| Anti-Mouse CD34, BV421                          | BD Biosciences | Cat# 562608           | FC           | 1:40            |

---

|                                                      |             |                 |    |       |
|------------------------------------------------------|-------------|-----------------|----|-------|
| Anti-Mouse CD135<br>(Flk2), BV421                    | eBioscience | Cat# 12-1351-82 | FC | 1:40  |
| Anti-Mouse CD135<br>(Flk2), PE                       | eBioscience | Cat# 12-1351-82 | FC | 1:33  |
| Anti-Mouse CD135<br>(Flk2), APC                      | eBioscience | Cat# 17-1351-82 | FC | 1:33  |
| Anti-Mouse CD34,<br>Biotin                           | eBioscience | Cat# 13-0341-85 | FC | 1:50  |
| Anti-Mouse CD135,<br>Biotin                          | eBioscience | Cat# 13-1351-85 | FC | 1:50  |
| Anti-human/mouse<br>CD45R (B220), APC-<br>eFluor 780 | eBioscience | Cat# 47-0452-82 | FC | 1:160 |
| Anti-mouse CD127,<br>PE                              | eBioscience | Cat# 12-1271-82 | FC | 1:80  |
| Anti-mouse CD16/32,<br>PE- Cyanine7                  | eBioscience | Cat# 25-0161-82 | FC | 1:80  |
| Anti-Mouse CD45R<br>(B220), APC-eFluor™<br>780       | eBioscience | Cat# 47-0452-80 | FC | 1:40  |
| Anti-Mouse CD3e,<br>FITC                             | eBioscience | Cat# 11-0031-85 | FC | 1:100 |
| Anti-Mouse Ly-6G<br>(Gr-1), PE                       | eBioscience | Cat# 12-5931-82 | FC | 1:667 |
| Anti-Mouse CD11b<br>(Mac-1), APC                     | eBioscience | Cat# 17-0112-83 | FC | 1:80  |
| Anti-Mouse CD45,<br>eFluor 450                       | eBioscience | Cat# 48-0451-82 | FC | 1:40  |
| Anti-Mouse CD150,<br>PE                              | Biolegend   | Cat# 115904     | FC | 1:100 |

---

---

|                                                                               |             |                 |    |       |
|-------------------------------------------------------------------------------|-------------|-----------------|----|-------|
| Anti-Mouse CD150,<br>PE- Cyanine7                                             | eBioscience | Cat# 25-1502-82 | FC | 1:40  |
| Anti-Mouse CD150,<br>Super Bright™ 645                                        | eBioscience | Cat# 64-1502-82 | FC | 1:40  |
| Anti-Mouse CD48,<br>FITC                                                      | eBioscience | Cat# 11-0481-85 | FC | 1:200 |
| Anti-Mouse CD48,<br>APC                                                       | eBioscience | Cat# 17-0481-82 | FC | 1:100 |
| Anti-Mouse CD48,<br>eFluor 450                                                | eBioscience | Cat# 48-0481-82 | FC | 1:40  |
| Anti-Mouse CD48,<br>Super Bright™ 702                                         | eBioscience | Cat# 67-0481-82 | FC | 1:100 |
| Anti-Mouse LDLR,<br>FITC                                                      | eBioscience | Cat# MA5-40965  | FC | 1:10  |
| Anti-Mouse LDLR,<br>PerCP                                                     | eBioscience | MA5-40964       | FC | 1:10  |
| LDLR Recombinant<br>Rabbit Monoclonal<br>Antibody                             | eBioscience | Cat# MA5- 29725 | FC | 1:100 |
| Anti-Phospho-mTOR<br>(Ser2448) Monoclonal<br>Antibody (MRRBY),<br>eFluor™ 450 | eBioscience | Cat#48-9718-42  | FC | 1:20  |
| Anti-Phospho-mTOR<br>(Ser2448) Monoclonal<br>Antibody (MRRBY),<br>eFluor™ 660 | eBioscience | Cat#50-9718-42  | FC | 1:20  |
| Anti-Human/Mouse<br>phospho-AKT (S473),<br>eFluor 450                         | eBioscience | Cat# 48-9715-42 | FC | 1:20  |
| Transferrin Receptor<br>Monoclonal Antibody<br>(R17217.1.4), PE               | eBioscience | Cat# MA5-17924  | FC | 1:10  |

---

---

|                                                                                      |                          |                 |    |        |
|--------------------------------------------------------------------------------------|--------------------------|-----------------|----|--------|
| Anti-Glutathione Peroxidase 4 antibody                                               | Abcam                    | Cat# ab125066   | FC | 1:100  |
| Anti-4 Hydroxynonenal antibody                                                       | Abcam                    | Cat# ab46545    | FC | 1:150  |
| Anti-Malondialdehyde antibody                                                        | Abcam                    | Cat# ab27642    | FC | 1:100  |
| Anti-LPCAT3 antibody                                                                 | Abcam                    | Cat# ab232958   | FC | 1:40   |
| Anti-Ferritin antibody [EPR3004Y]                                                    | Abcam                    | Cat# ab75973    | FC | 1:50   |
| Anti-SCD1 antibody [EPR21963]                                                        | Abcam                    | Cat# ab236868   | FC | 1:500  |
| Goat anti- Rabbit IgG(H+L) Cross-Adsorbed Secondary Antibody, Alexa Fluor 488        | Thermo Fisher Scientific | Cat# A-11008    | FC | 1:2000 |
| Goat anti-Rabbit IgG (H+L) Highly Cross-Adsorbed Secondary Antibody, Alexa Fluor 594 | Thermo Fisher Scientific | Cat# A-11037    | FC | 1:2000 |
| ATF4 Recombinant Rabbit Monoclonal Antibody (SD20-92)                                | Thermo Fisher Scientific | Cat# MA5-32364  | FC | 1:50   |
| SLC7A11 Polyclonal Antibody                                                          | Thermo Fisher Scientific | Cat# PA1-16893  | FC | 1:50   |
| SREBP1 Polyclonal antibody                                                           | Thermo Fisher Scientific | Cat# PA5-120378 | FC | 1:100  |
| ACSL4 Recombinant Rabbit Monoclonal Antibody (JE56-33)                               | Thermo Fisher Scientific | Cat# MA5-42523  | FC | 1:50   |

---

---

|                                        |                                |                |    |       |
|----------------------------------------|--------------------------------|----------------|----|-------|
| ALOX15 Monoclonal<br>Antibody (OTI7H6) | Thermo<br>Fisher<br>Scientific | Cat# MA5-25891 | FC | 1:100 |
|----------------------------------------|--------------------------------|----------------|----|-------|

---

**Table S2****Primers for mRNA expression analysis**

| <b>Gene</b>   | <b>Forward primer (5'-3')</b> | <b>Reverse primer (5'-3')</b> |
|---------------|-------------------------------|-------------------------------|
| <i>Ldlr</i>   | AGCAGGAGGGAGTCGAGAC           | G TTCCTAGCCGGAGATCGC          |
| <i>Srebf2</i> | GCAGCAACGGGACCATTCT           | CCCCATGACTAAGTCCTTCAACT       |
| <i>Hmgcr</i>  | TCTGTTGTGAACCATGTGACTTC       | AGCTTGCCCGAATTGTATGTG         |
| <i>Hprt</i>   | TCAGTCAACGGGGGACATAAA         | GGGGCTGTACTGCTTAACCAG         |

**Table S3**

| Gene id |         |         |         |         |           |         |
|---------|---------|---------|---------|---------|-----------|---------|
| Abca1   | Apon    | Cyp11b2 | Fgf1    | Lcat    | Npc2      | Soat2   |
| Abca2   | App     | Cyp27a1 | Fgl1    | Ldlr    | Nsdhl     | Sod1    |
| Abca5   | Arv1    | Cyp39a1 | Fmo5    | Ldlrap1 | Pcsk9     | Sqle    |
| Abcg1   | Cat     | Cyp46a1 | G6pd2   | Lepr    | Pctp      | Srebf1  |
| Abcg4   | Cebpa   | Cyp51   | G6pdx   | Lima1   | Pex2      | Srebf2  |
| Acadl   | Cel     | Cyp7a1  | Gba     | Lipc    | Pmp22     | Sult2b1 |
| Acadvl  | Ces1b   | Cyp7b1  | Gba2    | Lipe    | Pmvk      | Thrb    |
| Akr1d1  | Ces1c   | Dgat2   | Gnb3    | Lmf1    | Pon1      | Tm7sf2  |
| Angptl3 | Ces1d   | Dgkq    | Hdlbp   | Lpcat3  | Por       | Tnfsf4  |
| Aplp2   | Ces1e   | Dhcr24  | Hmgcr   | Lrp1    | Prkaa1    | Tsku    |
| Apoa1   | Ces1f   | Dhcr7   | Hmgcs1  | Lrp5    | Prkaa2    | Ttc39b  |
| Apoa2   | Ces1g   | Ebp     | Hmgcs2  | Lss     | Saa1      | Ttc39d  |
| Apoa4   | Cfr     | Ephx2   | Hnf1a   | Mbtps1  | Sc5d      | Vldlr   |
| Apoa5   | Ch25h   | Erlin1  | Hsd17b7 | Mt3     | Scap      |         |
| Apob    | Cln6    | Erlin2  | Hsd3b7  | Mttp    | Scarb1    |         |
| Apobr   | Cln8    | Fdft1   | Idi2    | Mvd     | Scp2      |         |
| Apoc1   | Cubn    | Fdps    | Il4     | Mvk     | Sec14l2   |         |
| Apoc3   | Cyb5r3  | Fdx1    | Insig1  | Nfe2l1  | Serpina12 |         |
| Apoe    | Cyp11a1 | Fdxr    | Insig2  | Npc1    | Smpd1     |         |
| Apof    | Cyp11b1 | Fech    | Lbr     | Npc1l1  | Soat1     |         |



**Figure S1**

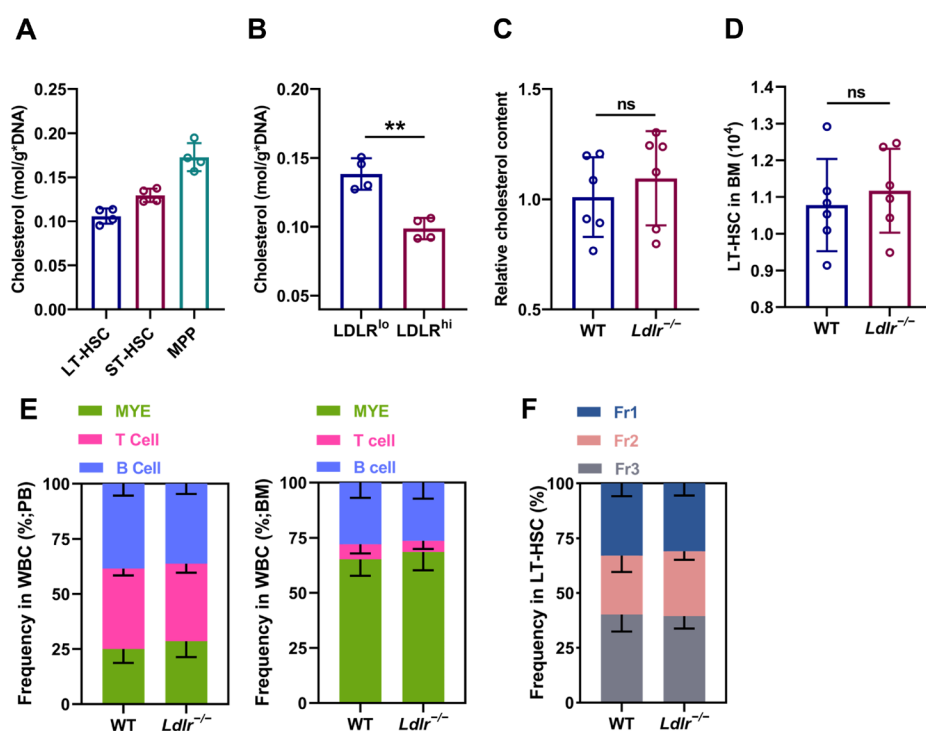

**Fig. S1. High levels of cholesterol favor maintenance and myeloid bias of HSCs.**

(A) Intracellular cholesterol contents in LT-HSCs, ST-HSCs and MPPs as detected by an Amplex™ Red Cholesterol Assay Kit ( $n = 4$ ). (B) Intracellular cholesterol contents in LDLR<sup>lo</sup> and LDLR<sup>hi</sup> LT-HSCs as detected by an Amplex™ Red Cholesterol Assay Kit ( $n = 4$ ). (C) Flow cytometric analysis of intracellular cholesterol contents in BM LT-HSCs of WT and *Ldlr*<sup>-/-</sup> mice ( $n = 6$ ). (D) Flow cytometric analysis of LT-HSC pool size in WT and *Ldlr*<sup>-/-</sup> mice ( $n = 6$ ). (E) Frequencies of T cells, B cells and myeloid cells in PB and BM of WT and *Ldlr*<sup>-/-</sup> mice ( $n = 6$ ). (F) Flow cytometric analysis of frequency of LT-HSC subpopulations in WT and *Ldlr*<sup>-/-</sup> mice ( $n = 6$ ). Data are mean  $\pm$  SD. n.s., \* $p < 0.05$ , \*\* $p < 0.01$ . not significant. two-tailed unpaired Student's *t*-test.

**Figure S2**

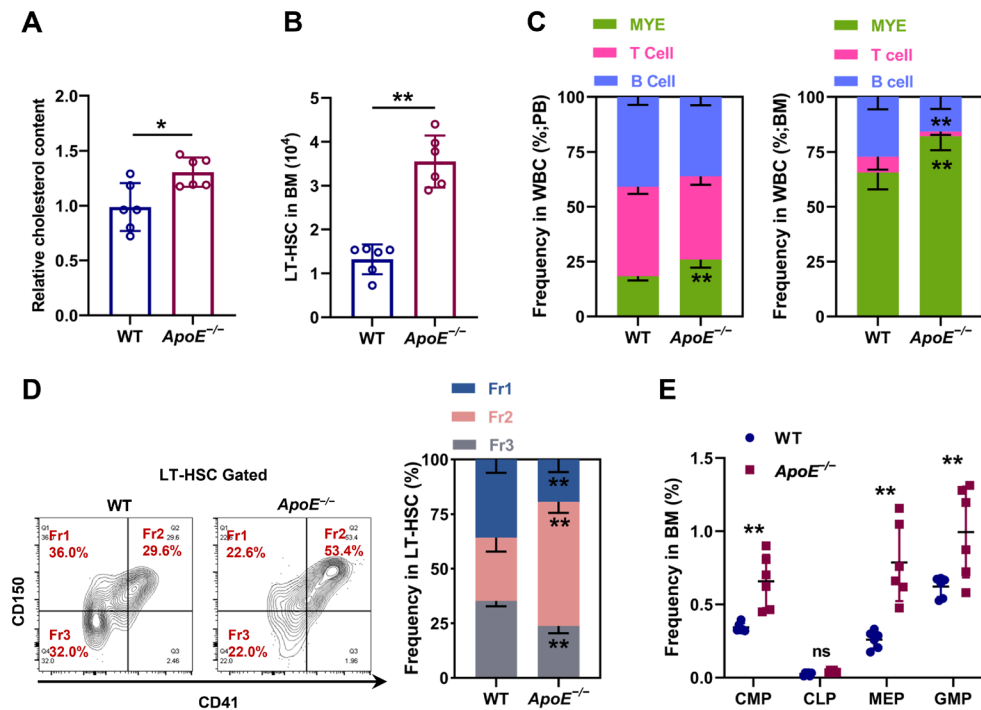

**Fig. S2. Hematopoietic phenotype of *ApoE*<sup>-/-</sup> mice.** (A) Flow cytometric analysis of intracellular cholesterol contents in BM LT-HSCs of WT and *ApoE*<sup>-/-</sup> mice ( $n = 6$ ). (B) Flow cytometric analysis of LT-HSC pool size in WT and *ApoE*<sup>-/-</sup> mice ( $n = 6$ ). (C) Frequencies of T cells, B cells and myeloid cells in PB and BM of WT and *ApoE*<sup>-/-</sup> mice ( $n = 6$ ). (D) Flow cytometric analysis of frequency of LT-HSC subpopulations in WT and *ApoE*<sup>-/-</sup> mice ( $n = 6$ ). (E) Flow cytometric analysis of frequencies of BM CMPs, CLPs, GMPs and MEPs in WT and *ApoE*<sup>-/-</sup> mice ( $n = 6$ ). Data are mean  $\pm$  SD. n.s., not significant. \* $p < 0.05$ , \*\* $p < 0.01$ . Two-tailed unpaired Student's  $t$ -test.

**Figure S3**

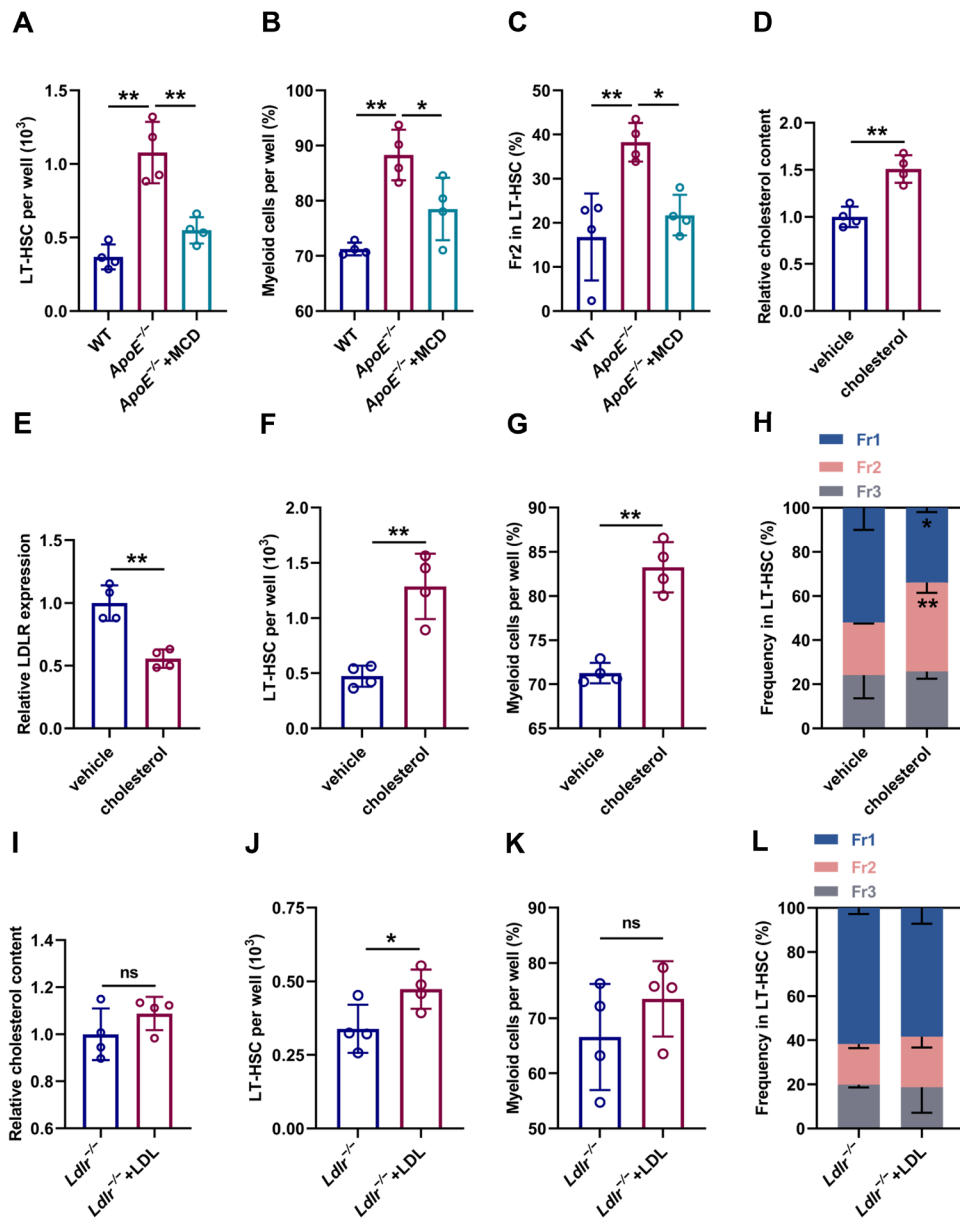

**Fig. S3. Cholesterol directly regulates maintenance and lineage differentiation of**

**HSCs.** (A) LT-HSC numbers per well in LT-HSC cultures from WT and *ApoE*<sup>-/-</sup> mice with or without MCD treatment ( $n = 4$ ). (B) Frequencies of myeloid cell output in LT-HSC cultures from WT and *ApoE*<sup>-/-</sup> mice with or without MCD treatment ( $n = 4$ ). (C) Frequency of Fr2 LT-HSCs in LT-HSC cultures from WT and *ApoE*<sup>-/-</sup> mice with or without MCD treatment ( $n = 4$ ). (D and E) Flow cytometric analysis of intracellular cholesterol contents (D) and surface expression of LDLR (E) in LT-HSCs with or without

cholesterol treatment ( $n = 4$ ). (F) LT-HSC numbers per well in LT-HSC cultures with or without cholesterol treatment ( $n = 4$ ). (G) Frequencies of myeloid cell output in LT-HSC cultures with or without cholesterol treatment ( $n = 4$ ). (H) Frequency of LT-HSC subpopulations in LT-HSC cultures with or without cholesterol treatment ( $n = 4$ ). (I) Flow cytometric analysis of intracellular cholesterol contents in LT-HSCs from *Ldlr*<sup>-/-</sup> mice with or without LDL treatment ( $n = 4$ ). (J) LT-HSC numbers per well in LT-HSC cultures from *Ldlr*<sup>-/-</sup> mice with or without LDL treatment ( $n = 4$ ). (K) Frequencies myeloid cell output in LT-HSC cultures from *Ldlr*<sup>-/-</sup> mice with or without LDL treatment ( $n = 4$ ). (L) Frequency of LT-HSC subpopulations in LT-HSC cultures from *Ldlr*<sup>-/-</sup> mice with or without LDL treatment ( $n = 4$ ). Data are mean  $\pm$  SD. \* $p < 0.05$ , \*\* $p < 0.01$ . Two-tailed unpaired Student's *t*-test unless stated otherwise. One-way ANOVA (A–C).

**Figure S4**

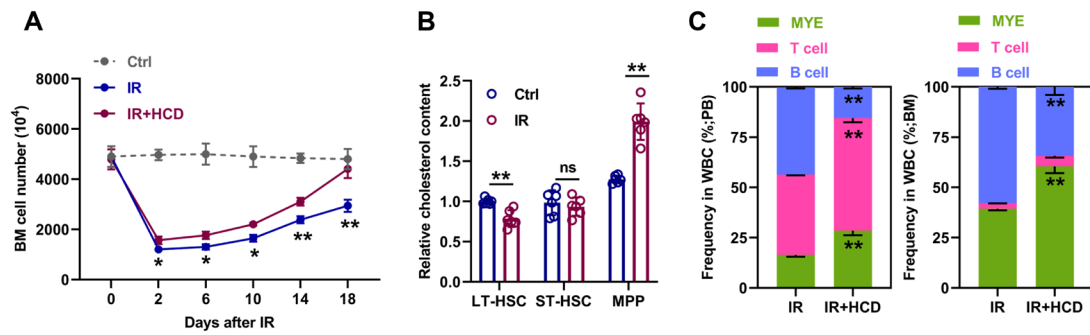

**Fig. S4. Cholesterol safeguards HSC maintenance and myeloid regeneration during irradiation-induced myelosuppression.** (A) BM cell numbers in CD and HCD mice post IR ( $n = 4$ ). (B) Flow cytometric analysis of intracellular cholesterol contents in BM HSPCs 24 h post IR ( $n = 6$ ). (C) Frequencies of T cells, B cells and myeloid cells in PB and BM of CD and HCD mice post IR ( $n = 6$ ). Data are mean  $\pm$  SD. n.s., not significant.  $*p < 0.05$ ,  $**p < 0.01$ . Two-tailed unpaired Student's  $t$ -test.

**Figure S5**

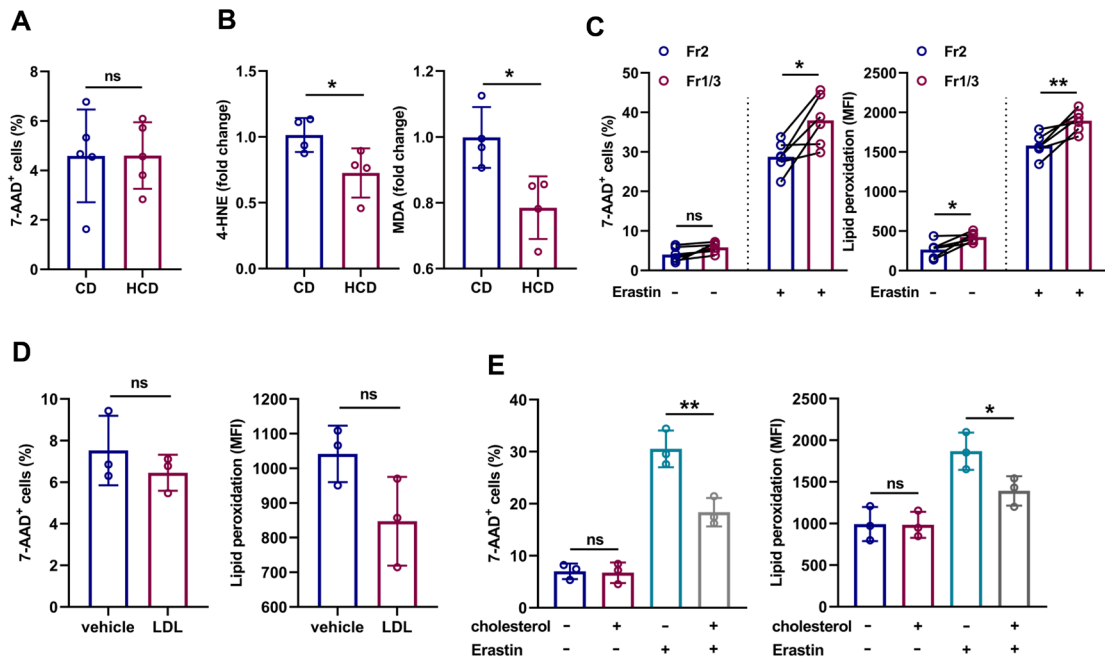

**Fig. S5. Cholesterol directly enhances ferroptosis resistance of HSCs.** (A) Flow cytometric analysis of cell death in BM LT-HSCs of CD and HCD mice ( $n = 5$ ). (B) ELISA analysis of 4-HNE and MDA contents in BM LT-HSCs of CD and HCD mice ( $n = 4$ ). (C) Ferroptosis resistance analysis of Fr2 and Fr1/3 LT-HSCs ( $n = 6$ ). (D) Cell death and membrane lipid peroxidation in LT-HSCs with or without LDL treatment ( $n = 3$ ). (E) Ferroptosis resistance analysis of LT-HSCs with indicated treatment ( $n = 3$ ). Data are mean  $\pm$  SD. n.s., not significant. \* $p < 0.05$ , \*\* $p < 0.01$ , Two-tailed unpaired Student's  $t$ -test unless stated otherwise. Two-tailed paired Student's  $t$ -test (C). One-way ANOVA (E).

**Figure S6**

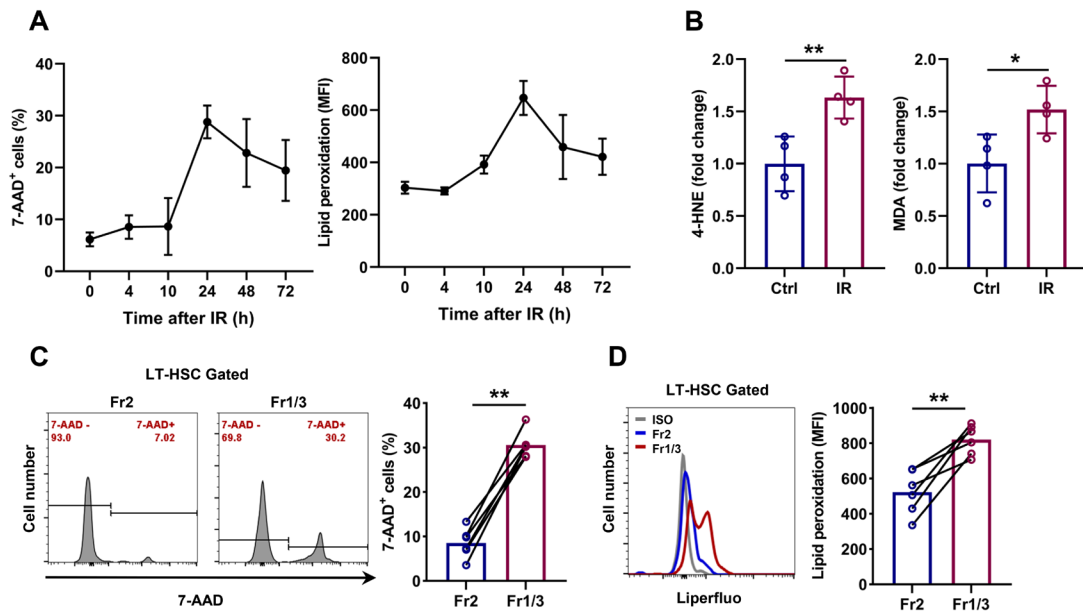

**Fig. S6. Cholesterol enhances ferroptosis resistance of HSCs during irradiation-induced myelosuppression.** (A) Flow cytometric analysis of cell death and membrane lipid peroxidation in BM LT-HSCs at 24 h post IR ( $n = 4$ ). (B) ELISA analysis of 4-HNE and MDA contents in BM LT-HSCs at 24 h post IR ( $n = 4$ ). (C and D) Flow cytometric analysis of cell death (C) and membrane lipid peroxidation (D) in Fr2 and Fr1/3 LT-HSCs 24 h post IR ( $n = 6$ ). Data are mean  $\pm$  SD.  $**p < 0.01$ . Two-tailed unpaired Student's  $t$ -test (B). Two-tailed paired Student's  $t$ -test (C and D).

**Figure S7**

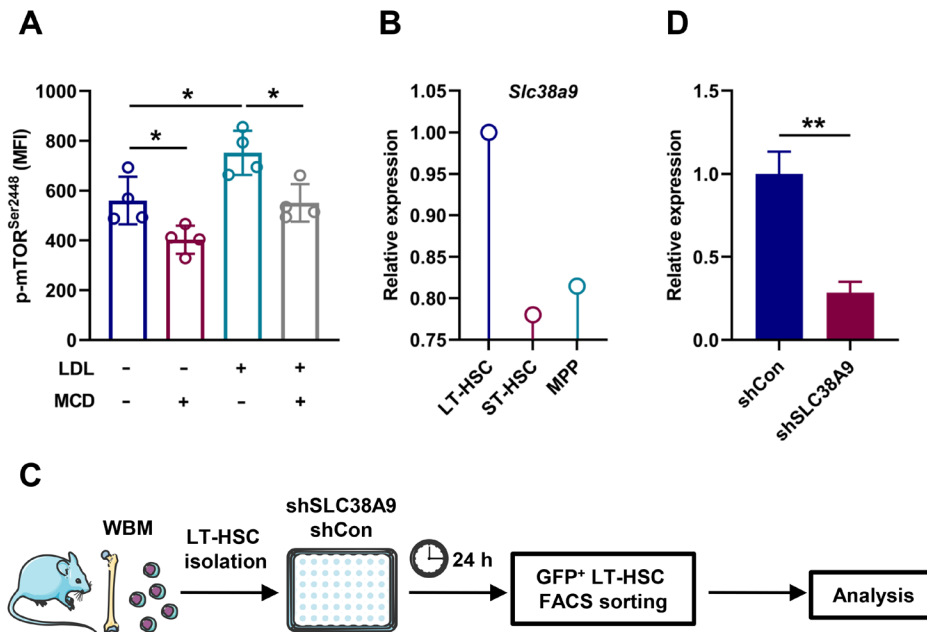

**Fig. S7. SLC38A9–mTOR axis mediates cholesterol sensing and signal transduction in HSCs.** (A) Flow cytometric analysis of p-mTOR<sup>Ser2448</sup> protein levels in LT-HSCs with indicated treatment ( $n = 4$ ). (B) Relative mRNA expression of *Slc38a9* based on a published transcriptome database of HSPCs (ArrayExpress: E-MTAB-3079). (C) The protocol for lentiviral transduction and following treatment. (D) Relative *Slc38a9* mRNA expression of *Slc38a9* in LT-HSCs after lentiviral transduction. Data are mean  $\pm$  SD. \* $p < 0.05$ , \*\* $p < 0.01$ . One-way ANOVA (A), two-tailed unpaired Student's *t*-test (D).



**Figure S8**

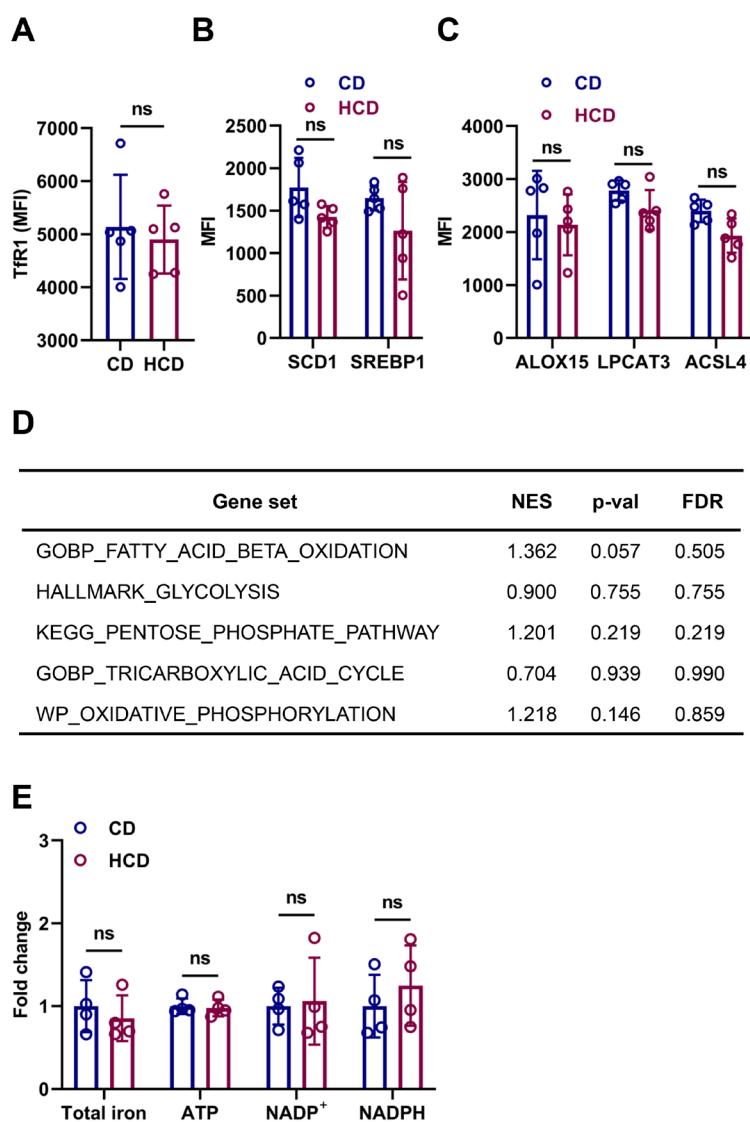

**Fig. S8. mTOR has no impact on iron import, MUFA generation, lipid peroxide generation and energy metabolism in LT-HSCs of HCD mice.** (A–C) Flow cytometric analysis of Tfr1, SREBP1/SCD1 and ACSL4/LPCAT3/ALOX15 protein levels in BM LT-HSCs of CD and HCD mice ( $n = 5$ ). (D) GSEA of indicated gene sets in BM LT-HSCs of HCD mice. (E) Intracellular total iron, ATP, NADP<sup>+</sup> and NADPH levels in BM LT-HSCs of CD and HCD mice ( $n = 4$ ). Data are mean  $\pm$  SD. \* $p < 0.05$ , \*\* $p < 0.01$ , Two-tailed unpaired Student's  $t$ -test.

**Figure S9**

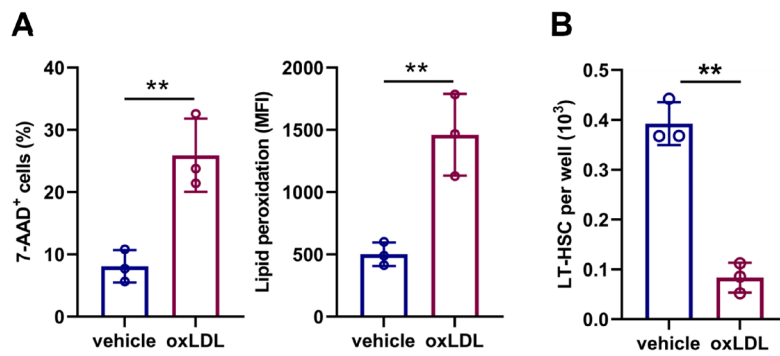

**Fig. S9. oxLDL enhances ferroptosis sensitivity and impairs maintenance of LT-HSCs *in vitro*.** (A) Cell death and membrane lipid peroxidation of LT-HSCs with or without oxLDL treatment ( $n = 3$ ). (B) LT-HSC numbers per well in LT-HSC cultures with or without oxLDL treatment ( $n = 3$ ). Data are mean  $\pm$  SD. \* $p < 0.05$ , \*\* $p < 0.01$ , two-tailed unpaired Student's  $t$ -test.
